# Supplementary material
Source: Springer Nature journal article supplement (https://www.springermedizin.de/resource/supplementary/12879_2011_2104_MOESM3_ESM.pdf/9444026)

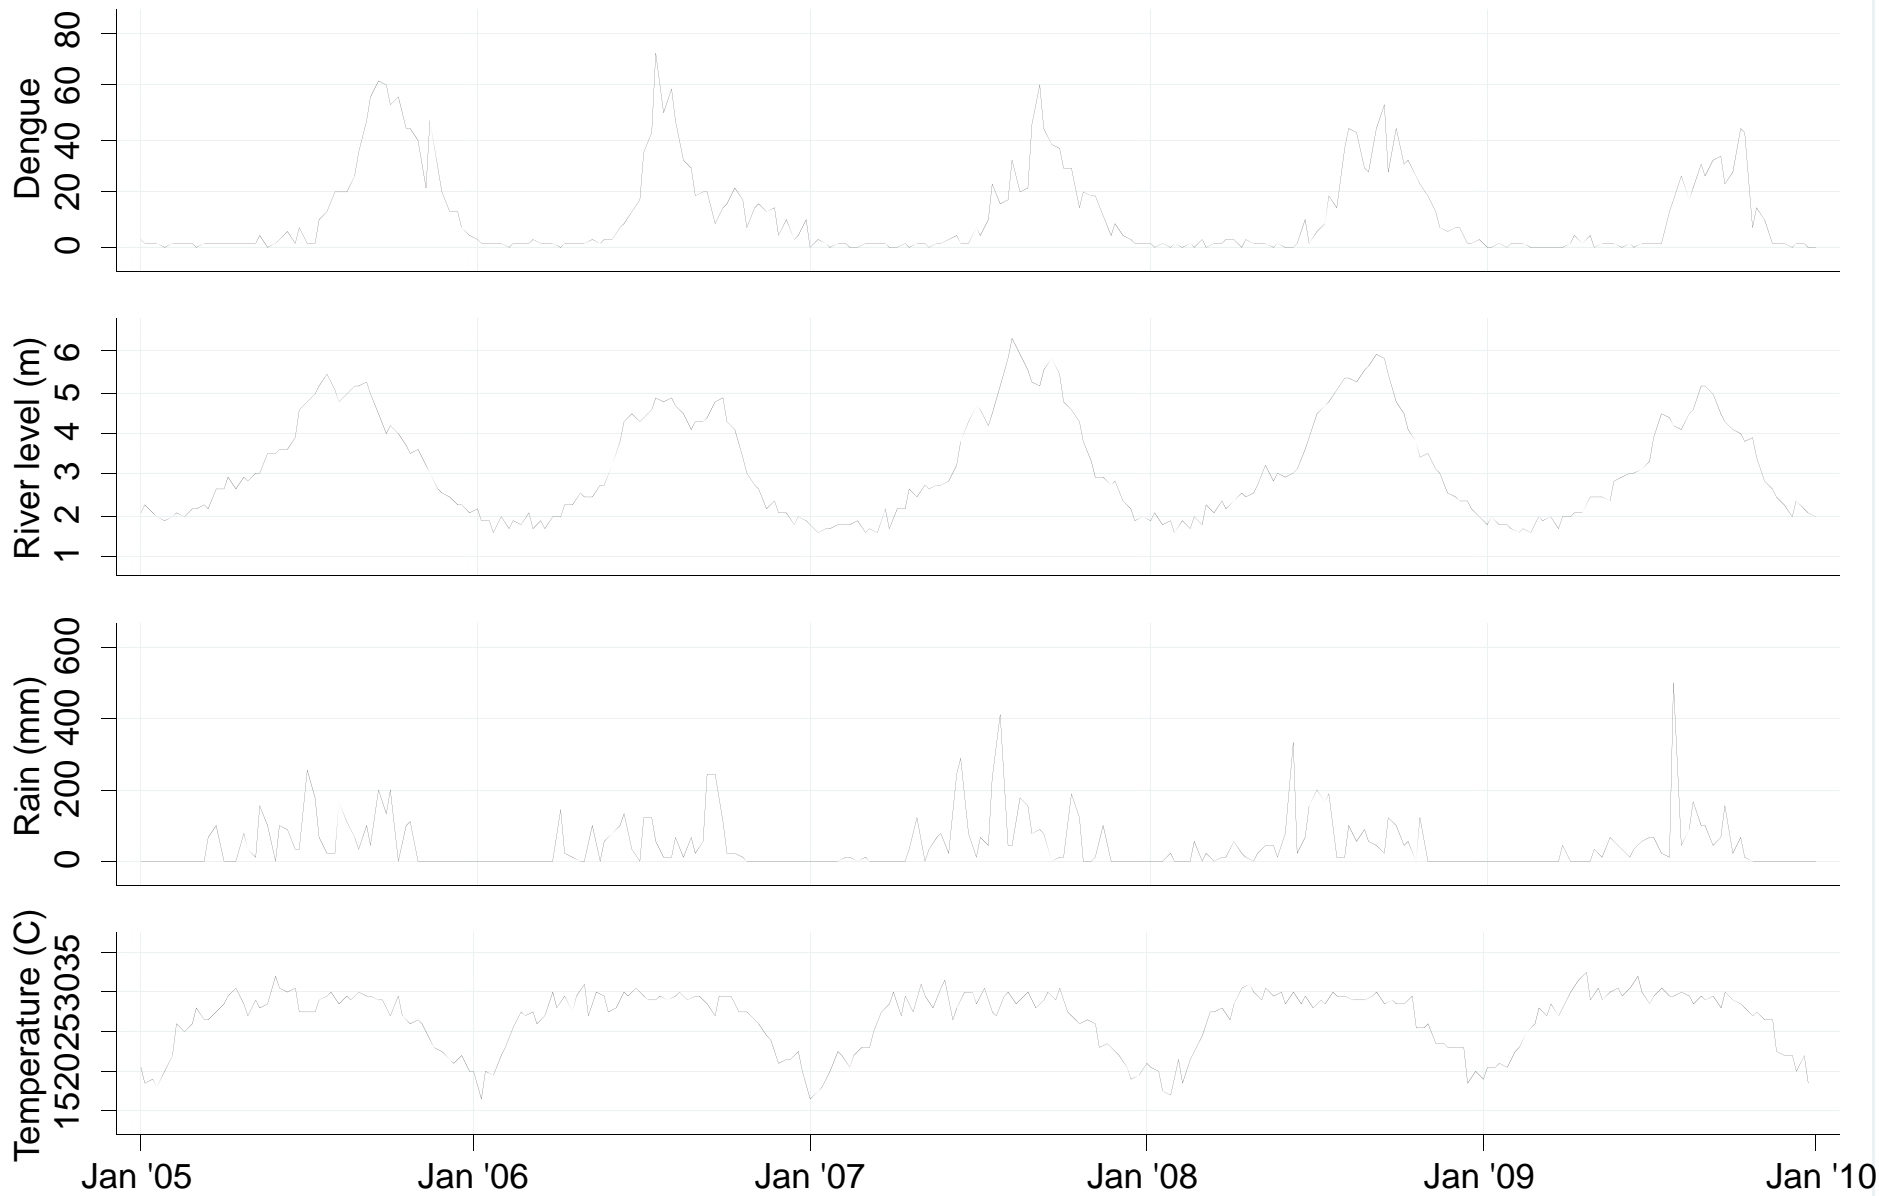

Supplement: MOESM3 [file 9444026]
